# Supplementary material
Source: PubMed Central journal article supplement (PMC8553000)
Supplement: NIHMS1740646-supplement-MajorResourcesTable.pdf [file NIHMS1740646-supplement-MajorResourcesTable.pdf]

## Major Resources Table

In order to allow validation and replication of experiments, all essential research materials listed in the Methods should be included in the Major Resources Table below. Authors are encouraged to use public repositories for protocols, data, code, and other materials and provide persistent identifiers and/or links to repositories when available. Authors may add or delete rows as needed.

### Animals (in vivo studies)

| Species    | Vendor or Source | Background Strain | Sex  | Persistent ID / URL                                                                                         |
|------------|------------------|-------------------|------|-------------------------------------------------------------------------------------------------------------|
| Guinea pig | Hilltop          | Hartley           | Male | <a href="http://www.hilltoplabs.com/public/hartley.html">http://www.hilltoplabs.com/public/hartley.html</a> |

### Antibodies

| Target antigen                   | Vendor or Source                   | Catalog # | Working concentration | Persistent ID / URL                                                                                                                                                                                                 |
|----------------------------------|------------------------------------|-----------|-----------------------|---------------------------------------------------------------------------------------------------------------------------------------------------------------------------------------------------------------------|
| PDE1A                            | Santa Cruz Biotechnology           | Sc-50480  | 1:1000                |                                                                                                                                                                                                                     |
| PDE1C                            | Abcam                              | Ab14602   | 1:5000                |                                                                                                                                                                                                                     |
| GAPDH                            | Cell Signaling                     | 5174      | 1:2000                |                                                                                                                                                                                                                     |
| Phospho-Ser <sup>23/24</sup> Tnl | Cell Signaling                     | 4004      | 1:1000                | <a href="https://www.cellsignal.com/products/primary-antibodies/troponin-i-antibody/4004">https://www.cellsignal.com/products/primary-antibodies/troponin-i-antibody/4004</a>                                       |
| total Tnl                        | Cell Signaling                     | 4002      | 1:1000                | <a href="https://www.cellsignal.com/products/primary-antibodies/troponin-i-antibody/4002">https://www.cellsignal.com/products/primary-antibodies/troponin-i-antibody/4002</a>                                       |
| phospho-Ser <sup>273</sup> MyBPC | Gift from Dr. Sakthivel Sadayappan | n/a       | 1:2000                | n/a                                                                                                                                                                                                                 |
| phospho-Ser <sup>282</sup> MyBPC | Gift from Dr. Sakthivel Sadayappan | n/a       | 1:4000                | n/a                                                                                                                                                                                                                 |
| phospho-Ser <sup>302</sup> MyBPC | Gift from Dr. Sakthivel Sadayappan | n/a       | 1:4000                | n/a                                                                                                                                                                                                                 |
| total MyBPC                      | Gift from Dr. Sakthivel Sadayappan | n/a       | 1:2000                | n/a                                                                                                                                                                                                                 |
| phospho-Ser <sup>16</sup> PLN    | Badrilla                           | 010-12    | 1:2000                | <a href="https://badrilla.com/media/datasheets/A010-12AP.pdf">https://badrilla.com/media/datasheets/A010-12AP.pdf</a>                                                                                               |
| total PLN                        | ThermoFisher Scientific            | MA3-922   | 1:3000                | <a href="https://www.thermofisher.com/antibody/product/Phospholamban-Antibody-clone-2D12-Monoclonal/MA3-922">https://www.thermofisher.com/antibody/product/Phospholamban-Antibody-clone-2D12-Monoclonal/MA3-922</a> |

### Data & Code Availability

| Description                        | Source / Repository | Persistent ID / URL                                                                                   |
|------------------------------------|---------------------|-------------------------------------------------------------------------------------------------------|
| Ca <sup>2+</sup> transient fitting | MatLab              | <a href="https://github.com/vpjani/ca_transients.git">https://github.com/vpjani/ca_transients.git</a> |

### Other

| Description                | Source / Repository | Persistent ID / URL |
|----------------------------|---------------------|---------------------|
| Blocking buffer – 0.1% KPL | SeraCare            |                     |
