# Supplementary material
Source: PubMed Central journal article supplement (PMC8553000)

# Uncut Immunoblots

Fig 3C Tnl blots

Phospho S23/24

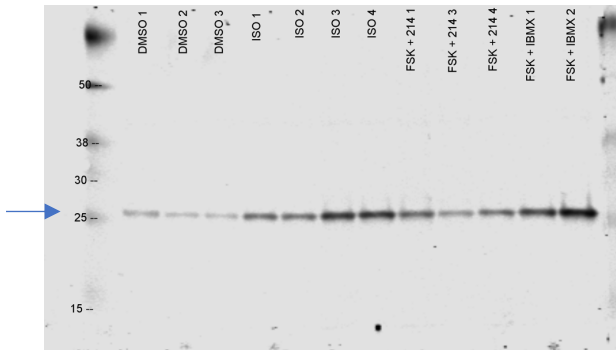

Total Tnl

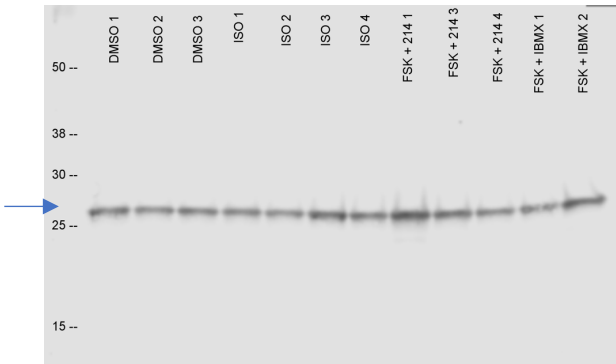

Fig 3C MyBPC blots

pS273

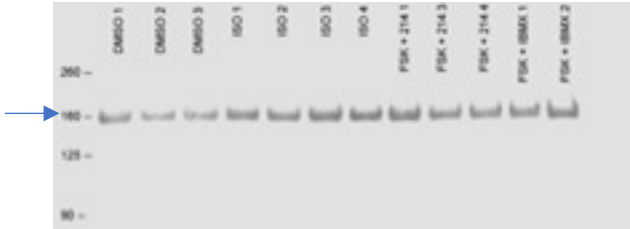

pS282

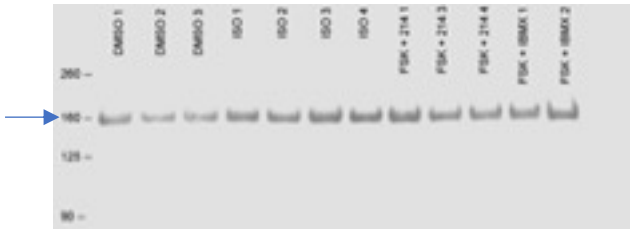

pS302

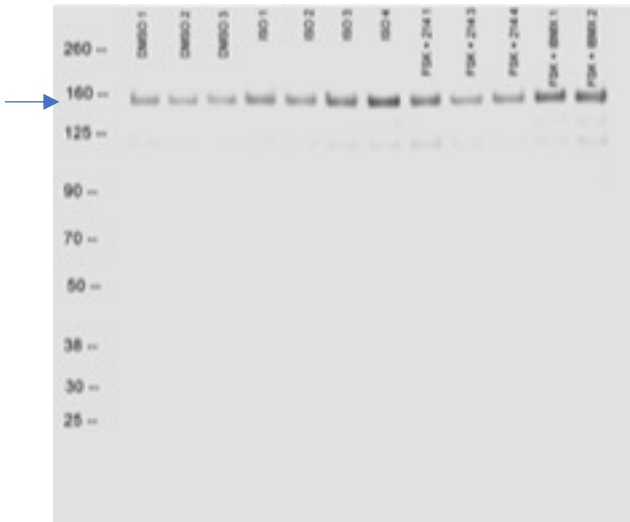

total MyBPC

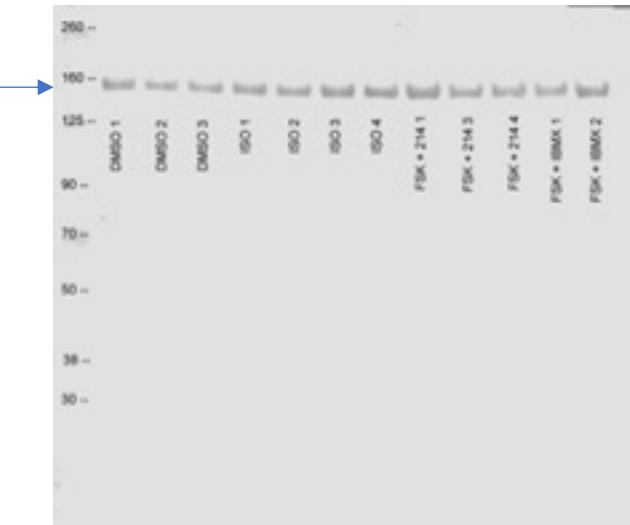

Fig 4C PLN blots  
pPLN, left; tPLN, right

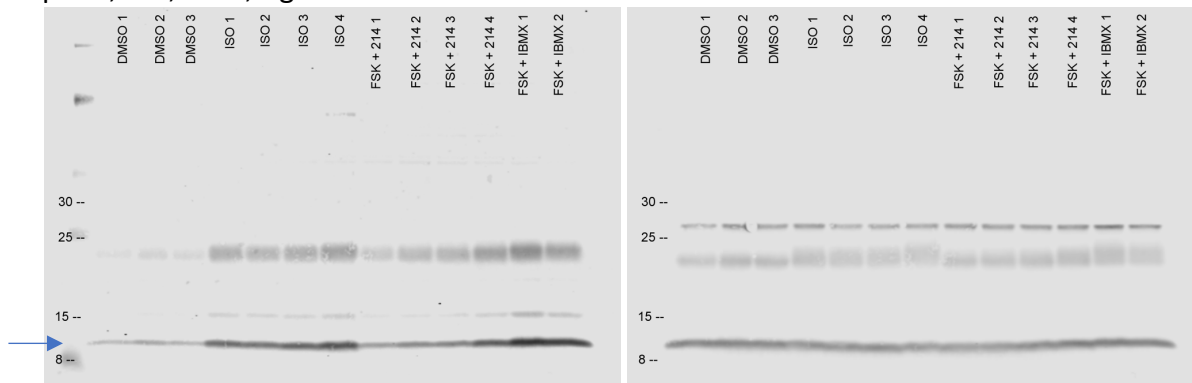

Fig 4D PLN blots  
Left blot, original:  
pPLN, left; tPLN, right

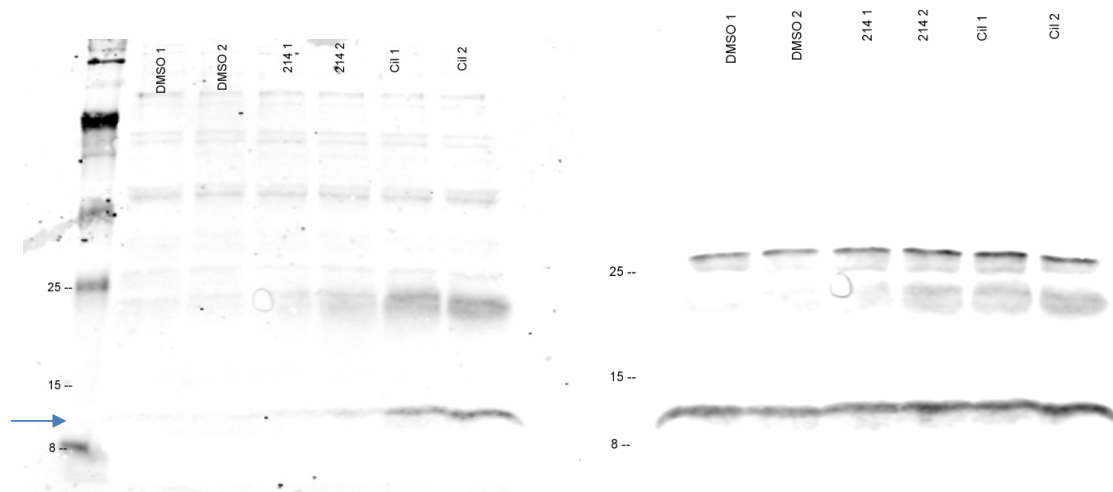

Center and right representative blots were taken from this original image:  
pPLN, top; tPLN, bottom

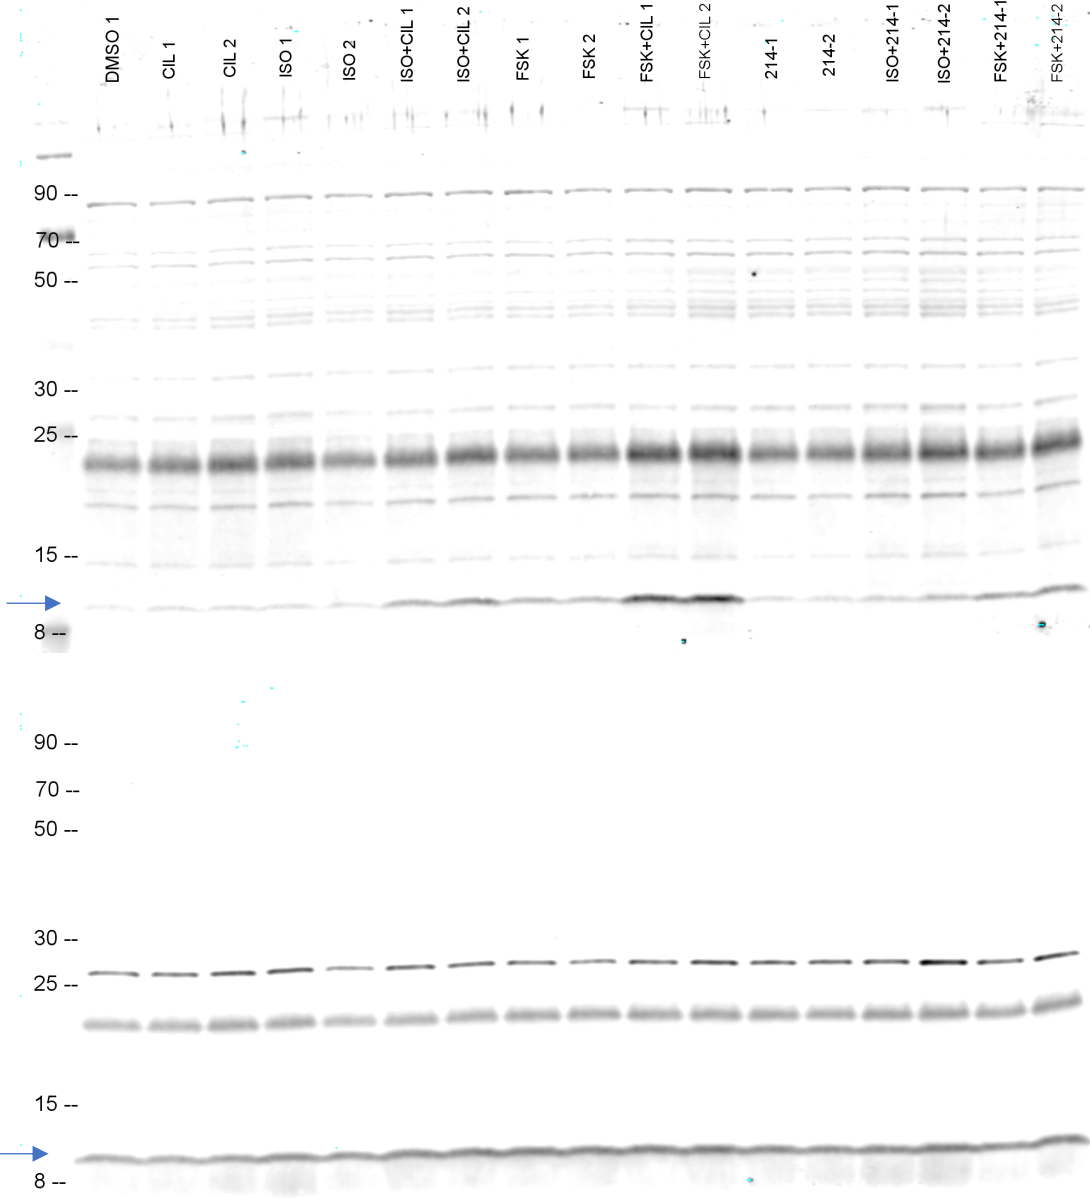

Supplemental Fig 1

PDE1A

PDE1C

GAPDH

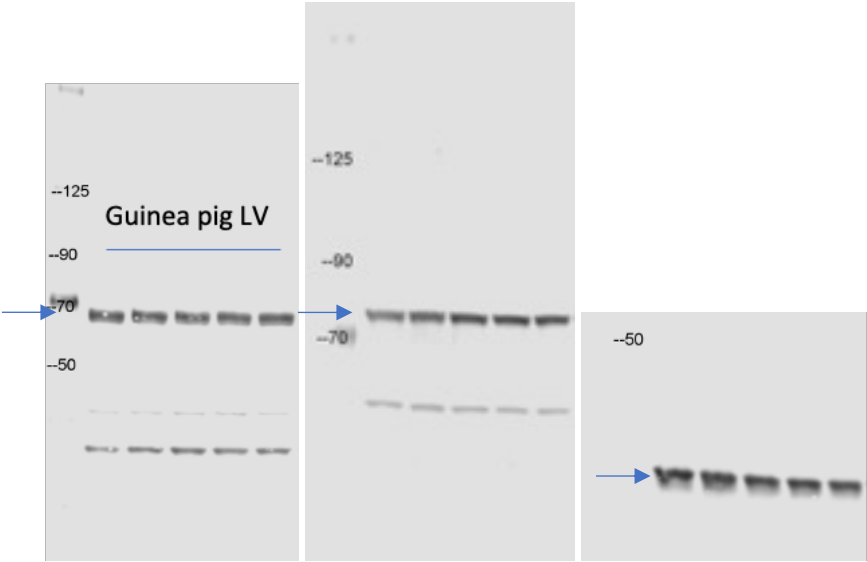

Supplement: NIHMS1740646-supplement-Supplemental_Publication_Material_1.pdf [file NIHMS1740646-supplement-Supplemental_Publication_Material_1.pdf]
